# Supplementary material for: Assessment of Aflatoxin and Fumonisin Contamination and Associated Risk Factors in Feed and Feed Ingredients in Rwanda
Source: Toxins (Basel). 2019 May 14;11(5):270. doi: 10.3390/toxins11050270 (PMC6563260; doi:10.3390/toxins11050270)
Supplement: Supplementary file 1 [file toxins-11-00270-s001.pdf]

# Supplementary Materials: Assessment of Aflatoxin and Fumonisin Contamination and Associated Risk Factors in Feed and Feed Ingredients in Rwanda

Kizito Nishimwe, Erin Bowers, Jean de Dieu Ayabagabo, Richard Habimana, Samuel Mutiga and Dirk Maier

**Table S1.** Comparison of aflatoxin levels (means in µg/kg) in feed ingredients and mixed feed in different categories of study participants.

| Participants    | Sampling Time | Mixed Feed (µg/kg) | Maize Bran (µg/kg) | Commercial Feeds (µg/kg) | Rice Bran (µg/kg) | Wheat Bran (µg/kg) | Brewery By-products (µg/kg) | Whole Maize (µg/kg) |
|-----------------|---------------|--------------------|--------------------|--------------------------|-------------------|--------------------|-----------------------------|---------------------|
| Dairy Farmers   | March         | 178.8              | 157.6              | -                        | 57.1              | 25.6               | 7.6                         | 22.7                |
|                 | April         | 128.8              | 111.0              | -                        | 98.8              | 119.6              | 2.8                         | 70.1                |
|                 | June          | 59.3               | 86.6               | -                        | 48.9              | 6.5                | 4.0                         | 169.8               |
|                 | July          | 119.5              | 91.0               | -                        | 179.4             | 111.7              | 26.9                        | 3.2                 |
|                 | August        | 132.5              | 119.8              | -                        | 109.8             | 79.4               | 24.5                        | 3.6                 |
|                 | October       | 123.6              | 159.4              | -                        | 148.0             | 121.6              | 43.0                        | 154.0               |
| Poultry Farmers | March         | 146.5              | 146.8              | -                        | 34.9              | 94.8               | -                           | 247.3               |
|                 | April         | 108.4              | 80.9               | -                        | 22.3              | 136.1              | -                           | 37.0                |
|                 | June          | 74.6               | 56.9               | -                        | 22.3              | 22.3               | -                           | 20.4                |
|                 | July          | 103.5              | 101.1              | -                        | 65.5              | 3.0                | -                           | 52.8                |
|                 | August        | 92.3               | 90.8               | -                        | 12.0              | 165.5              | -                           | 24.4                |
|                 | October       | 112.9              | 116.8              | -                        | 103.5             | 63.9               | -                           | 63.9                |
| Feed Vendors    | March         | -                  | 148.5              | 94.3                     | -                 | -                  | -                           | -                   |
|                 | April         | -                  | 53.7               | 53.7                     | -                 | -                  | -                           | -                   |
|                 | June          | -                  | 72.5               | 77.7                     | -                 | -                  | -                           | -                   |
|                 | July          | -                  | 59.1               | 82.1                     | -                 | -                  | -                           | -                   |
|                 | August        | -                  | 118.9              | 95.1                     | -                 | -                  | -                           | -                   |
|                 | October       | -                  | 99.6               | 94.4                     | -                 | -                  | -                           | -                   |
| Feed Processors | March         | -                  | 148.6              | 239.6                    | -                 | -                  | -                           | -                   |
|                 | April         | -                  | 121.5              | 123.0                    | -                 | -                  | -                           | -                   |
|                 | June          | -                  | 12.5               | 77.3                     | -                 | -                  | -                           | -                   |

|         |   |       |      |   |   |   |   |
|---------|---|-------|------|---|---|---|---|
| July    | - | 101.0 | 70.3 | - | - | - | - |
| August  | - | 80.8  | 35.1 | - | - | - | - |
| October | - | 99.6  | 94.4 | - | - | - | - |

**Table S2.** Total mean aflatoxin levels of feed ingredient types over sampling periods.

| Sampling Time | Mixed Feed (µg/kg) | Maize Bran (µg/kg) | Commercial feeds(µg/kg) | Rice bran(µg/kg) | Wheat bran(µg/kg) | Brewery by-products(µg/kg) | Whole Maize (µg/kg) |
|---------------|--------------------|--------------------|-------------------------|------------------|-------------------|----------------------------|---------------------|
| March         | 151.4              | 149.0              | 105.5                   | 50.3             | 37.8              | 7.6                        | 157.5               |
| April         | 111.5              | 93.7               | 67.5                    | 79.6             | 122.5             | 2.8                        | 45.2                |
| June          | 72.4               | 74.6               | 77.7                    | 40.7             | 9.9               | 4.0                        | 70.2                |
| July          | 105.8              | 85.8               | 81.1                    | 141.5            | 96.2              | 26.9                       | 1.8                 |
| August        | 98.1               | 113.2              | 90.8                    | 79.7             | 92.6              | 24.5                       | 18.5                |
| October       | 114.5              | 147.6              | 94.3                    | 131.8            | 110.1             | 43.0                       | 110.9               |

**Table S3.** Total mean aflatoxin levels (µg/kg) for ingredient types and sampling periods across geographical districts.

| District | Sampling Time | Mix   | Maize Bran | Commercial Feeds | Rice Bran | Wheat Bran | Brewery By-products | Whole Maize |
|----------|---------------|-------|------------|------------------|-----------|------------|---------------------|-------------|
| Gasabo   | March         | 93.3  | 154.5      | -                | 22.3      | -          | -                   | -           |
|          | April         | 123.5 | 118.3      | -                | 28.2      | -          | -                   | -           |
|          | June          | 116.1 | 36.4       | -                | 104.6     | -          | -                   | -           |
|          | July          | 43.8  | 82.4       | -                | 198.4     | -          | -                   | -           |
|          | August        | 86.9  | 108.5      | -                | 48.3      | -          | -                   | -           |
|          | October       | 62.2  | 169.2      | -                | 20.3      | -          | -                   | -           |
| Kayonza  | March         | 92.3  | 95.1       | -                | -         | -          | -                   | -           |
|          | April         | 220.9 | 111.0      | -                | -         | -          | -                   | -           |
|          | June          | 75.8  | 51.2       | -                | -         | -          | -                   | -           |
|          | July          | 98.9  | 53.2       | -                | -         | -          | -                   | -           |
|          | August        | 22.3  | 38.2       | -                | -         | -          | -                   | -           |
|          | October       | -     | 85.9       | -                | -         | -          | -                   | -           |
| Burera   | March         | 168.9 | 184.4      | -                | -         | -          | -                   | 247.1       |
|          | April         | 90.7  | 13.8       | -                | -         | -          | -                   | 6.4         |

|                  |         |       |       |       |      |       |   |      |
|------------------|---------|-------|-------|-------|------|-------|---|------|
|                  | June    | 30.8  | 7.7   | -     | -    | -     | - | 8.6  |
|                  | July    | 112.6 | 117.1 | -     | -    | -     | - | 10.5 |
|                  | August  | 108.6 | 150.4 | -     | -    | -     | - | 0.3  |
|                  | October | 92.2  | 82.2  | -     | -    | -     | - | 59.1 |
| <b>Rutsiro</b>   | March   | 172.1 | 0.3   | -     | -    | -     | - | -    |
|                  | April   | 165.6 | 8.3   | -     | -    | -     | - | -    |
|                  | June    | 8.4   | 0.3   | -     | -    | -     | - | -    |
|                  | July    | 201.9 | 123.5 | -     | -    | -     | - | -    |
|                  | August  | 66.2  | 66.5  | -     | -    | -     | - | -    |
|                  | October | 34.0  | 68.7  | -     | -    | -     | - | -    |
| <b>Gisagara</b>  | March   | 0.3   | 20.0  | -     | -    | 8.6   | - | -    |
|                  | April   | 7.0   | 12.2  | -     | -    | 13.7  | - | -    |
|                  | June    | 64.9  | 501.0 | -     | -    | 0.3   | - | -    |
|                  | July    | 7.4   | 0.3   | -     | -    | 321.4 | - | -    |
|                  | August  | 0.3   | -     | -     | -    | 53.1  | - | -    |
|                  | October | -     | 158.4 | -     | -    | 40.8  | - | -    |
| <b>Nyaruguru</b> | March   | 250.8 | 168.1 | -     | -    | 41.9  | - | -    |
|                  | April   | 129.7 | 81.7  | -     | -    | 157.4 | - | -    |
|                  | June    | 223.6 | 40.2  | -     | -    | 0.3   | - | -    |
|                  | July    | 154.7 | 91.4  | -     | -    | 371.4 | - | -    |
|                  | August  | 128.9 | 198.5 | -     | -    | 159.6 | - | -    |
|                  | October | 104.6 | 124.3 | -     | -    | -     | - | -    |
| <b>Gicumbi</b>   | March   | 153.4 | 218.9 | 11.7  | -    | 30.4  | - | -    |
|                  | April   | 136.9 | 26.5  | 50.3  | -    | 220.0 | - | -    |
|                  | June    | 118.2 | 85.5  | 55.2  | -    | 0.3   | - | -    |
|                  | July    | 138.8 | 124.6 | 234.5 | -    | 16.8  | - | -    |
|                  | August  | 146.5 | 240.5 | 138.6 | -    | 149.3 | - | -    |
|                  | October | 192.8 | 273.5 | 42.1  | -    | 304.9 | - | -    |
| <b>Huye</b>      | March   | 167.4 | 255.4 | 266.8 | 22.7 | 20.6  | - | -    |
|                  | April   | 113.2 | 80.2  | 367.5 | 15.9 | 116.3 | - | -    |

|                  |         |       |       |         |       |      |   |      |
|------------------|---------|-------|-------|---------|-------|------|---|------|
|                  | June    | 70.6  | 109.5 | #DIV/0! | 46.7  | 2.4  | - | -    |
|                  | July    | 117.5 | 73.3  | 79.3    | 133.7 | 93.3 | - | -    |
|                  | August  | 163.5 | 58.8  | 0.3     | 15.5  | 83.5 | - | -    |
|                  | October | 158.7 | 124.4 | 115.1   | 199.9 | 93.8 | - | -    |
| <b>Gakenke</b>   | March   | 177.3 | 102.6 | 13.8    | -     | -    | - | -    |
|                  | April   | 52.0  | 49.6  | 0.3     | -     | -    | - | -    |
| <b>Gakenke</b>   | June    | 102.4 | 171.8 | 15.6    | -     | -    | - | -    |
|                  | July    | 101.9 | 70.5  | 41.0    | -     | -    | - | -    |
|                  | August  | 107.7 | 161.5 | 104.9   | -     | -    | - | -    |
|                  | October | 61.2  | 56.2  | 0.3     | -     | -    | - | -    |
| <b>Kamonyi</b>   | March   | 186.9 | 202.0 | -       | -     | -    | - | -    |
|                  | April   | 98.5  | 88.8  | -       | -     | -    | - | -    |
|                  | June    | 75.7  | 58.7  | -       | -     | -    | - | -    |
|                  | July    | 117.1 | 32.6  | -       | -     | -    | - | -    |
|                  | August  | 79.5  | 199.7 | -       | -     | -    | - | -    |
|                  | October | 256.4 | 17.9  | -       | -     | -    | - | -    |
| <b>Nyamagabe</b> | March   | 287.4 | 220.2 | -       | 0.3   | -    | - | -    |
|                  | April   | 170.7 | 47.0  | -       | 57.7  | -    | - | -    |
|                  | June    | 214.7 | 90.5  | -       | 17.5  | -    | - | -    |
|                  | July    | 73.0  | 41.1  | -       | 97.5  | -    | - | -    |
|                  | August  | 126.2 | 159.5 | -       | 253.3 | -    | - | -    |
|                  | October | 194.9 | 140.6 | -       | 9.5   | -    | - | -    |
| <b>Ngoma</b>     | March   | 128.2 | 208.9 | -       | -     | -    | - | -    |
|                  | April   | 92.4  | 131.4 | -       | -     | -    | - | -    |
|                  | June    | 32.8  | 8.9   | -       | -     | -    | - | -    |
|                  | July    | 97.3  | 110.6 | -       | -     | -    | - | -    |
|                  | August  | 106.7 | 71.6  | -       | -     | -    | - | -    |
|                  | October | 92.8  | 159.0 | -       | -     | -    | - | -    |
| <b>Kirehe</b>    | March   | 130.9 | 180.5 | -       | 14.8  | -    | - | 34.3 |
|                  | April   | 35.5  | 54.6  | -       | 29.6  | -    | - | 35.6 |

|                  |         |       |       |       |       |       |   |       |
|------------------|---------|-------|-------|-------|-------|-------|---|-------|
|                  | June    | 17.6  | 9.9   | -     | 0.3   | -     | - | 18.0  |
|                  | July    | 126.4 | 86.8  | -     | 41.5  | -     | - | 61.8  |
|                  | August  | 72.4  | 3.1   | -     | 0.3   | -     | - | 76.3  |
|                  | October | 87.6  | 332.3 | -     | 137.9 | -     | - | 130.7 |
| <b>Ngororero</b> | March   | 181.8 | 139.8 | 0.3   | -     | -     | - | -     |
|                  | April   | 247.7 | 152.8 | 159.1 | -     | -     | - | -     |
|                  | June    | 73.7  | 118.2 | 82.6  | -     | -     | - | -     |
|                  | July    | 103.2 | 1.5   | 153.5 | -     | -     | - | -     |
|                  | August  | 103.2 | 90.2  | 120.4 | -     | -     | - | -     |
|                  | October | 68.1  | 199.8 | 52.2  | -     | -     | - | -     |
| <b>Karongi</b>   | March   | 64.3  | 230.3 | -     | -     | -     | - | -     |
|                  | April   | 61.4  | 98.6  | -     | -     | -     | - | -     |
|                  | June    | 89.2  | 66.8  | -     | -     | -     | - | -     |
|                  | July    | 54.2  | 157.2 | -     | -     | -     | - | -     |
|                  | August  | 67.8  | 48.2  | -     | -     | -     | - | -     |
|                  | October | 99.6  | 183.8 | -     | -     | -     | - | -     |
| <b>Nyagatare</b> | March   | 51.2  | 129.8 | -     | -     | -     | - | 501.0 |
|                  | April   | 88.1  | 93.9  | -     | -     | -     | - | 84.7  |
|                  | June    | 5.4   | 96.7  | -     | -     | -     | - | 0.3   |
|                  | July    | 91.2  | 42.5  | -     | -     | -     | - | 145.4 |
|                  | August  | 112.5 | 150.4 | -     | -     | -     | - | -     |
|                  | October | 93.2  | 178.5 | -     | -     | -     | - | -     |
| <b>Nyanza</b>    | March   | 154.5 | 88.5  | -     | -     | 94.8  | - | -     |
|                  | April   | 225.7 | 98.1  | -     | -     | 73.6  | - | -     |
|                  | June    | 74.1  | 106.9 | -     | -     | 52.8  | - | -     |
|                  | July    | 149.4 | 55.0  | -     | -     | 0.3   | - | -     |
|                  | August  | 293.4 | 83.6  | -     | -     | 254.7 | - | -     |
|                  | October | 181.0 | 149.0 | -     | -     | 20.1  | - | -     |
| <b>Ruhango</b>   | March   | 135.9 | 132.9 | -     | -     | -     | - | 139.2 |
|                  | April   | 49.9  | 501.0 | -     | -     | -     | - | 7.5   |

|                  |         |       |       |       |       |       |       |       |
|------------------|---------|-------|-------|-------|-------|-------|-------|-------|
|                  | June    | 41.0  | 75.5  | -     | -     | -     | -     | 0.3   |
|                  | July    | 113.0 | 136.7 | -     | -     | -     | -     | 44.8  |
|                  | August  | 86.8  | 44.2  | -     | -     | -     | -     | 31.1  |
|                  | October | 63.6  | 154.5 | -     | -     | -     | -     | 185.3 |
| <b>Kicukiro</b>  | March   | 153.9 | 120.0 | -     | -     | 20.4  | 0.3   | -     |
|                  | April   | 203.4 | 114.6 | -     | -     | 0.3   | 0.3   | -     |
|                  | June    | 64.2  | 96.5  | -     | -     | 12.4  | -     | -     |
|                  | July    | 125.9 | 81.3  | -     | -     | -     | 198.5 | -     |
|                  | August  | 92.6  | 120.1 | -     | -     | 0.3   | 7.6   | -     |
|                  | October | 70.1  | 67.7  | -     | -     | 9.4   | 328.1 | -     |
| <b>Muhanga</b>   | March   | 180.2 | 175.0 | -     | -     | -     | -     | -     |
|                  | April   | 103.4 | 68.2  | -     | -     | -     | -     | -     |
|                  | June    | 50.4  | 101.6 | -     | -     | -     | -     | -     |
|                  | July    | 35.5  | 151.8 | -     | -     | -     | -     | -     |
|                  | August  | 89.2  | 104.4 | -     | -     | -     | -     | -     |
|                  | October | 30.2  | 103.4 | -     | -     | -     | -     | -     |
| <b>Rwamagana</b> | March   | 277.0 | 278.1 | 452.5 | -     | 101.0 | -     | -     |
|                  | April   | 165.2 | 108.1 | 8.8   | -     | 68.4  | -     | -     |
|                  | June    | 50.4  | 101.6 | -     | -     | -     | -     | -     |
|                  | July    | 60.5  | 163.9 | 24.4  | -     | -     | -     | -     |
|                  | August  | 53.4  | 87.7  | 14.5  | -     | -     | -     | -     |
|                  | October | 96.0  | 231.3 | 34.2  | -     | -     | -     | -     |
| <b>Nyabihu</b>   | March   | 106.4 | 288.8 | -     | -     | 88.6  | -     | -     |
|                  | April   | 49.9  | 266.5 | -     | -     | 266.4 | -     | -     |
|                  | June    | 34.5  | 254.5 | -     | -     | 5.4   | -     | -     |
|                  | July    | 101.1 | 246.6 | -     | -     | 5.7   | -     | -     |
|                  | August  | 44.5  | 47.1  | -     | -     | 76.2  | -     | -     |
|                  | October | 188.1 | 313.2 | -     | -     | 107.7 | -     | -     |
| <b>Rulindo</b>   | March   | 152.9 | 58.5  | -     | 170.4 | 29.9  | -     | 13.3  |
|                  | April   | 105.7 | 78.8  | -     | 236.6 | 144.6 | -     | 140.0 |

|                   |         |       |       |       |       |       |      |       |
|-------------------|---------|-------|-------|-------|-------|-------|------|-------|
|                   | June    | 126.8 | 139.5 | -     | 5.8   | 12.1  | -    | 501.0 |
|                   | July    | 79.5  | 148.5 | -     | 188.9 | 78.2  | -    | 6.2   |
|                   | August  | 158.5 | 100.6 | -     | 89.1  | 55.5  | -    | 6.9   |
|                   | October | 185.8 | 175.2 | -     | 298.1 | 331.2 | -    | -     |
| <b>Gatsibo</b>    | March   | 51.6  | 80.3  | -     | 0.3   | -     | -    | -     |
|                   | April   | 142.0 | 137.2 | -     | 0.3   | -     | -    | -     |
|                   | June    | 26.0  | 42.7  | -     | 11.6  | -     | -    | -     |
|                   | July    | 52.8  | 88.3  | -     | 124.0 | -     | -    | -     |
|                   | August  | 43.6  | 70.4  | -     | 53.1  | -     | -    | -     |
|                   | October | 71.9  | 99.4  | -     | -     | -     | -    | -     |
| <b>Nyarugenge</b> | March   | 123.8 | 110.4 | 24.3  | -     | -     | -    | 324.2 |
|                   | April   | 101.5 | 74.1  | 18.6  | -     | -     | -    | 81.2  |
|                   | June    | 34.3  | 65.6  | 32.0  | -     | -     | -    | 68.7  |
|                   | July    | 121.2 | 84.3  | 39.3  | -     | -     | -    | 43.7  |
|                   | August  | 118.7 | 208.2 | 130.7 | -     | -     | -    | 14.1  |
|                   | October | 37.9  | 148.0 | 73.9  | -     | -     | -    | 41.2  |
| <b>Rusizi</b>     | March   | 152.1 | 167.1 | -     | -     | -     | -    | -     |
|                   | April   | 120.4 | 173.8 | -     | -     | -     | -    | -     |
|                   | June    | 44.8  | 96.5  | -     | -     | -     | -    | -     |
|                   | July    | 100.8 | 72.0  | -     | -     | -     | -    | -     |
|                   | August  | 46.4  | 62.4  | -     | -     | -     | -    | -     |
|                   | October | 168.3 | 217.1 | -     | -     | -     | -    | -     |
| <b>Rubavu</b>     | March   | 84.2  | 72.1  | 48.6  | -     | -     | 4.2  | -     |
|                   | April   | 14.4  | 9.7   | 9.8   | -     | -     | 5.3  | -     |
|                   | June    | 59.8  | 13.0  | 6.0   | -     | -     | 0.3  | -     |
|                   | July    | 135.5 | 27.0  | 99.2  | -     | -     | 0.3  | -     |
|                   | August  | 46.2  | 31.4  | 33.4  | -     | -     | 50.3 | -     |
|                   | October | 109.5 | 89.5  | 456.9 | -     | -     | 20.0 | -     |
| <b>Nyamasheke</b> | March   | 128.5 | 39.3  | 349.4 | -     | -     | -    | -     |
|                   | April   | 64.2  | 57.1  | 0.3   | -     | -     | -    | -     |

|                 |         |       |       |       |   |   |      |   |
|-----------------|---------|-------|-------|-------|---|---|------|---|
|                 | June    | 57.5  | 160.3 | 501.0 | - | - | -    | - |
|                 | July    | 154.0 | 46.1  | 0.3   | - | - | -    | - |
|                 | August  | 132.9 | 57.8  | 11.9  | - | - | -    | - |
|                 | October | 118.3 | 34.3  | 0.3   | - | - | -    | - |
| <b>Musanze</b>  | March   | 248.2 | 165.7 | 239.6 | - | - | 14.7 | - |
|                 | April   | 171.6 | 47.5  | 123.0 | - | - | 0.3  | - |
|                 | June    | 86.4  | 50.7  | 77.3  | - | - | 15.3 | - |
|                 | July    | 90.8  | 58.9  | 70.3  | - | - | 24.0 | - |
|                 | August  | 116.6 | 97.5  | 35.1  | - | - | 0.3  | - |
|                 | October | 118.9 | 107.5 | 94.4  | - | - | 6.2  | - |
| <b>Bugesera</b> | March   | 160.1 | 70.1  | 6.9   | - | - | -    | - |
|                 | April   | 102.9 | 110.9 | 10.7  | - | - | -    | - |
|                 | June    | 40.8  | 131.2 | -     | - | - | -    | - |
|                 | July    | 172.0 | 18.9  | -     | - | - | -    | - |
|                 | August  | 36.4  | 156.8 | 195.3 | - | - | -    | - |
|                 | October | 56.4  | 136.3 | -     | - | - | -    | - |

**Table S4.** The sample number of each feed ingredient type by each sampling round.

|                            | Round 1 | Round 2 | Round 3 | Round 4 | Round 5 | Round 6 | Total |
|----------------------------|---------|---------|---------|---------|---------|---------|-------|
| <b>Maize Bran</b>          | 248     | 223     | 177     | 198     | 210     | 135     | 1191  |
| <b>Mixed Feed</b>          | 298     | 303     | 331     | 305     | 240     | 247     | 1724  |
| <b>Rice Bran</b>           | 13      | 13      | 13      | 15      | 19      | 15      | 88    |
| <b>Whole Maize</b>         | 10      | 3       | 1       | 0       | 3       | 0       | 17    |
| <b>Commercial Feeds</b>    | 13      | 26      | 23      | 28      | 34      | 28      | 152   |
| <b>Brewery By-products</b> | 13      | 14      | 10      | 12      | 16      | 12      | 77    |
| <b>Wheat Bran</b>          | 17      | 11      | 15      | 11      | 17      | 8       | 79    |
| <b>Total</b>               | 612     | 593     | 570     | 569     | 539     | 445     | 3328  |

**Table S5.** The co-occurrence of aflatoxins and fumonisins in the samples.

|                          | Round 1 | Round 2 | Round 3 | Round 4 | Round 5 | Round 6 | Total |
|--------------------------|---------|---------|---------|---------|---------|---------|-------|
| <b>Number of Samples</b> | 131     | 93      | 355     | 69      | 69      | 45      | 762   |
| <b>Percentage</b>        | 21.4    | 15.7    | 62.9    | 12.1    | 12.8    | 10.1    | 22.9  |

**Table S6.** Prevalence (percentage of positive samples) above the limit of quantification for aflatoxins and fumonisins by sample type and per round of sample.

|                     | Round 1 (%) |           | Round 2 (%) |           | Round 3 (%) |           | Round 4 (%) |           | Round 5 (%) |           | Round 6 (%) |           | Total (%)  |           |
|---------------------|-------------|-----------|-------------|-----------|-------------|-----------|-------------|-----------|-------------|-----------|-------------|-----------|------------|-----------|
|                     | Aflatoxins  | Fumonisin | Aflatoxins | Fumonisin |
| Maize Bran          | 89.9        | 29        | 79.8        | 28.6      | 77.4        | 42.4      | 84.9        | 44.9      | 79          | 48.8      | 95.6        | 67.4      | 84.4       | 43.4      |
| Mixed Feed          | 90.6        | 21.8      | 81.5        | 22.4      | 77.6        | 39.3      | 88.5        | 42        | 84.2        | 45.4      | 94.7        | 63.6      | 86.2       | 39.1      |
| Rice Bran           | 61.5        | 0         | 53.9        | 7.7       | 53.9        | 38.5      | 73.3        | 26.7      | 73.7        | 52.6      | 80          | 66.7      | 66         | 32        |
| Whole Maize         | 90          | 100       | 66.7        | 0         | 100         | 0         | 0           | 0         | 66.7        | 33.3      | 0           | 0         | 53.9       | 22        |
| Commercial Feeds    | 76          | 7.7       | 80.8        | 3.9       | 82.6        | 43.5      | 89.3        | 46.4      | 97.1        | 64.7      | 82.1        | 82.1      | 84.8       | 41        |
| Brewery By-products | 23.1        | 100       | 14.3        | 14.3      | 10          | 100       | 16.7        | 16.7      | 50          | 56.3      | 75          | 58.3      | 31.5       | 57.6      |
| Wheat Bran          | 64.7        | 11.8      | 72.7        | 27.3      | 60          | 100       | 100         | 36.4      | 100         | 53        | 100         | 62.5      | 82.9       | 48.5      |
| Total               | 71          | 38.6      | 64.2        | 14.8      | 65.9        | 51.9      | 64.7        | 30.4      | 78.7        | 51        | 75.4        | 57.2      | 69.9       | 40.6      |
